# Supplementary material for: Evaluation of potential COVID-19 recurrence in patients with late repeat positive SARS-CoV-2 testing
Source: PubMed Central journal article supplement (PMC8096096; doi:10.1371/journal.pone.0251214), 2021-05-04
Supplement: pone.0251214.s001.pdf [file pone.0251214.s001.pdf]

**S1 Table**

**ONLINE SUPPLEMENT**

**EVALUATION OF POTENTIAL COVID-19 RECURRENCE IN PATIENTS WITH  
LATE REPEAT POSITIVE SARS-COV-2 TESTING**

Ithan D. Peltan, MD, MSc, Sarah J. Beesley, MD, MS, Brandon J. Webb, MD,  
Bert K. Lopansri, MD, Will Sinclair, BS, Jason R. Jacobs, PhD, Samuel M. Brown, MD, MS

**S1 Table. SARS-CoV-2 RT-PCR assays.**

| Assay manufacturer                | Genes targeted <sup>a</sup> | Ct values reported per test | Maximum Ct value for assay | Assays performed <sup>b</sup> | Positive <sup>b</sup> | Ct value available <sup>b</sup> |
|-----------------------------------|-----------------------------|-----------------------------|----------------------------|-------------------------------|-----------------------|---------------------------------|
| Centers for Disease Control [1,2] | N (3 targets) <sup>c</sup>  | 3                           | 40                         | 3                             | 3                     | 3                               |
| Quidel [3]                        | ORF                         | 1                           | 30                         | 51                            | 46                    | 44                              |
| Cepheid [4]                       | N, E                        | 2                           | 45                         | 32                            | 32                    | 31                              |
| Thermo Fisher Scientific [5]      | ORF, N, S                   | 3                           | 40                         | 195                           | 164                   | 164                             |
| Hologic [6]                       | ORF (2 targets)             | 1                           | 40                         | 7                             | 7                     | 7                               |
| Biofire [7]                       | ORF (3 targets)             | N/A <sup>d</sup>            | N/A <sup>d</sup>           | 3                             | 3                     | 0                               |
| Roche [8]                         | ORF, E                      | 2                           | 40                         | 4                             | 2                     | 2                               |

Abbreviations: Ct, cycle threshold; ORF, open reading frame

<sup>a</sup> SARS-CoV-2 genes targeted by utilized assays were the those encoding the structural nucleocapsid (N), envelope (E), and spike (S) proteins and the open reading frame (ORF) polyprotein.[9]

<sup>b</sup> Includes RT-PCR assays (positive and negative) performed for patients with  $\geq 1$  recurrent positive RT-PCR assay  $\geq 60$  days after their initial positive assay.

<sup>c</sup> At the time this assay was used, CDC assay employed three targets. The CDC RT-PCR has subsequently been reduced to two targets.

<sup>d</sup> Cycle threshold values are not reported for this assay.

- Holshue ML, DeBolt C, Lindquist S, Lofy KH, Wiesman J, Bruce H, et al. First Case of 2019 Novel Coronavirus in the United States. *New Engl J Med.* 2020;382: 929–936. doi:10.1056/NEJMoa2001191
- CDC 2019 Novel Coronavirus (nCoV) Real-Time RT-PCR Diagnostic Panel — Instructions for Use. In: U.S. Food Drug Administration [Internet]. 12 Jul 2020 [cited 18 Nov 2020]. Available: <https://www.fda.gov/media/134922/download>
- Lyra® SARS-CoV-2 Assay Instructions for Use. In: Quidel [Internet]. 21 May 2020 [cited 18 Nov 2020]. Available: [https://www.quidel.com/sites/default/files/product/documents/PIM120002EN00\\_10\\_20\\_Lyra\\_SARS-CoV-2\\_Assay\\_Pkg\\_Insert\\_EUA.pdf](https://www.quidel.com/sites/default/files/product/documents/PIM120002EN00_10_20_Lyra_SARS-CoV-2_Assay_Pkg_Insert_EUA.pdf)
- Xpert Xpress SARS-CoV-2 Assay Instructions for Use. In: Cepheid [Internet]. Sep 2020 [cited 18 Nov 2020]. Available: <https://www.cepheid.com/Package%20Insert%20Files/Xpress-SARS-CoV-2/Xpert%20Xpress%20SARS-CoV-2%20Assay%20ENGLISH%20Package%20Insert%20302-3750-Xpress%20Rev.%20E.pdf>
- TaqPath COVID-19 Combo Kit: Instructions for Use. In: ThermoFisher Scientific [Internet]. 15 Mar 2020 [cited 18 Nov 2020]. Available: [https://assets.thermofisher.com/TFS-Assets/LSG/manuals/MAN0019181\\_TaqPath\\_COVID-19\\_IFU\\_EUA.pdf](https://assets.thermofisher.com/TFS-Assets/LSG/manuals/MAN0019181_TaqPath_COVID-19_IFU_EUA.pdf)
- SARS-CoV-2 Assay (Panther Fusion® System). In: Hologic [Internet]. 3 Apr 2006 [cited 18 Nov 2020] pp. 1–34. Available: [https://www.hologic.com/sites/default/files/2020-09/AW-21159-001\\_004\\_01.pdf](https://www.hologic.com/sites/default/files/2020-09/AW-21159-001_004_01.pdf)
- BioFire COVID-19 Test Instructions for Use. In: BioFire Defense [Internet]. 5 Oct 2020 [cited 18 Nov 2020]. Available: <https://www.biofiredefense.com/wp-content/uploads/2020/04/BioFire-COVID-19-Instructions-for-Use-DFA2-PRT-0080-03.pdf>
- Poljak M, Korva M, Knap Gašper N, Fujs Komloš K, Sagadin M, Uršič T, et al. Clinical Evaluation of the cobas SARS-CoV-2 Test and a Diagnostic Platform Switch during 48 Hours in the Midst of the COVID-19 Pandemic. *J Clin Microbiol.* 2020;58. doi:10.1128/JCM.00599-20
- Tang Y-W, Schmitz JE, Persing DH, Stratton CW. Laboratory diagnosis of COVID-19: current issues and challenges. *J Clin Microbiol.* 2020;58. doi:10.1128/JCM.00512-20
